# Supplementary material for: Environmental and Anthropogenic Factors Shape Major Bacterial Community Types Across the Complex Mountain Landscape of Switzerland
Source: Front Microbiol. 2021 Mar 11;12:581430. doi: 10.3389/fmicb.2021.581430 (PMC7990788; doi:10.3389/fmicb.2021.581430)
Supplement: Supplementary file 2 [file Data_Sheet_2.XLSX]

## Sheet: Tabelle1
Supplementary table 8:
Pairwise Pearson correlations of environmental factors.
	oragnic carbon		pH		bulk density		carbon-nitrogen ratio		total nitrogen		soil water content		DNA content		plant indicator for moisture		plant indicator for variability of moisture		plant indicator for pH		plant indicator for nutrients		elevation		slope		exposition		mean annual temperaturea		SD inter-annual temperatureab		clay		silt		sand		mean annual precipitationac		SD inter-annual precipitationad		mean solar radiationac
	r	p	r	p	r	p	r	p	r	p	r	p	r	p	r	p	r	p	r	p	r	p	r	p	r	p	r	p	r	p	r	p	r	p	r	p	r	p	r	p	r	p	r	p
organic carbon
pH	-0.25	**
bulk density	-0.69	***	0.26	***
carbon-nitrogen ratio	0.39	***	-0.18	*	-0.52	***
total nitrogen	0.92	***	-0.13	0.06	-0.58	***	0.12	0.08
soil water content	0.66	***	-0.33	***	-0.5	***	0.07	0.32	0.67	***
DNA content	0.49	***	-0.14	*	-0.47	***	0.19	*	0.43	***	0.54	***
plant indicator for moisture	0.04	0.51	-0.1	0.14	-0.02	0.75	-0.08	0.25	0.04	0.57	0.41	***	0.22	**
plant indicator for variability of moisture	-0.02	0.8	0.13	0.05	0.11	0.09	-0.15	*	0.05	0.48	0.29	***	0.15	*	0.46	***
plant indicator for pH	-0.28	***	0.75	***	0.35	***	-0.2	*	-0.13	0.05	-0.28	***	-0.18	*	-0.02	0.71	0.21	**
plant indicator for nutrients	-0.28	***	0.36	***	0.57	***	-0.47	***	-0.12	0.06	-0.08	0.23	-0.16	*	0.27	***	0.38	***	0.45	***
elevation	0.2	*	-0.24	**	-0.43	***	0.24	**	0.14	*	0.07	0.25	0.1	0.13	-0.15	*	-0.36	***	-0.37	***	-0.77	***
slope	0.36	***	-0.2	*	-0.57	***	0.38	***	0.27	***	0.09	0.16	0.17	*	-0.24	**	-0.21	**	-0.26	***	-0.62	***	0.56	***
exposition	0	0.98	-0.09	0.22	-0.06	0.43	0.05	0.52	0	0.98	0.03	0.7	-0.03	0.7	-0.01	0.92	-0.09	0.18	-0.06	0.38	0.09	0.2	-0.04	0.51	0.02	0.74
mean annual temperaturea	-0.16	*	0.22	**	0.38	***	-0.21	*	-0.11	0.1	-0.06	0.34	-0.08	0.23	0.11	0.07	0.37	***	0.35	***	0.74	***	-0.99	***	-0.5	***	0.03	0.63
SD inter-annual temperatureab	0.09	0.18	0.06	0.35	-0.14	*	-0.07	0.26	0.16	*	0.25	***	0.13	*	0.25	***	0.04	0.49	0.06	0.32	-0.13	*	0.32	***	0.06	0.3	-0.01	0.84	-0.35	***
clay	0.07	0.32	0.19	*	0.07	0.32	-0.25	**	0.29	***	0.26	**	0.07	0.32	0.1	0.19	0.1	0.18	0.25	**	0.34	***	-0.28	***	-0.2	*	0.09	0.26	0.26	**	0.23	*
Silt	0.07	0.37	0.1	0.15	0.14	*	-0.06	0.38	0.12	0.1	0.19	*	0.01	0.88	0.13	0.07	0.18	*	0.08	0.27	0.14	0.05	-0.03	0.71	-0.14	*	-0.05	0.54	0.02	0.76	0.24	**	0.2	*
sand	-0.24	*	-0.16	*	0.01	0.93	0.16	*	-0.42	***	-0.38	***	-0.11	0.13	-0.14	0.05	-0.16	*	-0.18	*	-0.24	**	0.15	*	0.16	*	-0.04	0.59	-0.14	*	-0.31	***	-0.79	***	-0.73	***
mean annual precipitationac	0.24	**	-0.3	***	-0.22	**	-0.07	0.31	0.26	***	0.39	***	0.09	0.15	0.16	*	0.05	0.43	-0.21	**	-0.2	*	0.19	*	0.26	***	-0.03	0.69	-0.15	*	0.18	*	0.06	0.38	-0.2	*	0.03	0.72
SD inter-annual precipitationad	0.25	**	-0.38	***	-0.31	***	0.08	0.25	0.21	*	0.22	**	0.08	0.24	-0.04	0.52	-0.06	0.32	-0.36	***	-0.37	***	0.32	***	0.39	***	0	0.99	-0.24	***	-0.14	*	-0.21	*	-0.31	***	0.27	**	0.81	***
mean solar radiationac	0.02	0.81	-0.08	0.21	-0.12	0.06	0.17	*	-0.08	0.23	-0.22	**	0.01	0.82	-0.32	***	-0.16	*	-0.13	*	-0.22	**	0.16	*	0.2	*	0.04	0.51	-0.06	0.35	-0.51	***	-0.29	***	-0.12	0.11	0.26	**	-0.22	**	0.19	*
SD inter-annual solar radiatonad	0.11	0.1	-0.3	***	-0.22	**	0.08	0.22	0.07	0.31	-0.02	0.76	-0.04	0.58	-0.18	*	-0.36	***	-0.41	***	-0.54	***	0.68	***	0.29	***	-0.04	0.52	-0.68	***	-0.02	0.71	-0.3	***	-0.2	*	0.28	***	0.27	***	0.49	***	0.13	*
Stars denote significances with p-values below 0.5 (*), 0.001 (**) and 0.0001 (***)
SD standard deviation
a based on values between 1981-2010
b mean of monthly standard deviation
c mean of yearly sums
d mean of standard deviation of monthly sums
